# Supplementary material
Source: PubMed Central journal article supplement (PMC2833371)
Supplement: mmc1.pdf [file mmc1.pdf]

**Brown-Vialetto-Van Laere Syndrome,  
a Ponto-Bulbar Palsy with Deafness,  
Is Caused by Mutations in *C20orf54***

**Peter Green, Matthew Wiseman, Yanick J. Crow, Henry Houlden, Shelley Riphagen, Jean-Pierre Lin, F. Lucy Raymond, Anne-Marie Childs, Eamonn Sheridan, Sian Edwards, and Dragana J. Josifova**

|                           |                                                     |     |
|---------------------------|-----------------------------------------------------|-----|
| C20orf54_wt               | MAFLMHLLVLCVFGMGSWVTINGLWVELPLLVMELPEGWYLPSTVTVIQL  | 50  |
| C20orf54_c.1325_1326delTC | MAFLMHLLVLCVFGMGSWVTINGLWVELPLLVMELPEGWYLPSTVTVIQL  | 50  |
| C20orf54_wt               | ANIGPLLVTLLHHFRPSCSEVPIIFTLLGVGTVTCIIFAFLWNMTSWVL   | 100 |
| C20orf54_c.1325_1326delTC | ANIGPLLVTLLHHFRPSCSEVPIIFTLLGVGTVTCIIFAFLWNMTSWVL   | 100 |
| C20orf54_wt               | DGHHSIAFLVLTFFLALVDCTSSVTFLPFMSRLPTYLLTFFVGEGLSGL   | 150 |
| C20orf54_c.1325_1326delTC | DGHHSIAFLVLTFFLALVDCTSSVTFLPFMSRLPTYLLTFFVGEGLSGL   | 150 |
| C20orf54_wt               | LPALVALAQGSGLTTCVNVTEISDSVSPVPPTRETDIAQGVPRALVSALP  | 200 |
| C20orf54_c.1325_1326delTC | LPALVALAQGSGLTTCVNVTEISDSVSPVPPTRETDIAQGVPRALVSALP  | 200 |
| C20orf54_wt               | GMEAPLHLESRYLPAHFSPVLFVLLLSIMMACCLVAFFVLQRQPRCWEA   | 250 |
| C20orf54_c.1325_1326delTC | GMEAPLHLESRYLPAHFSPVLFVLLLSIMMACCLVAFFVLQRQPRCWEA   | 250 |
| C20orf54_wt               | SVEDLLNDQVTLHSIRPREENDLGPAGTVDSSQGGYLEEKAAPCCPAHL   | 300 |
| C20orf54_c.1325_1326delTC | SVEDLLNDQVTLHSIRPREENDLGPAGTVDSSQGGYLEEKAAPCCPAHL   | 300 |
| C20orf54_wt               | AFIYTLVAFVNALTNGLMPSVQTYSCLSYGPVAYHLAATLSIVANPLASL  | 350 |
| C20orf54_c.1325_1326delTC | AFIYTLVAFVNALTNGLMPSVQTYSCLSYGPVAYHLAATLSIVANPLASL  | 350 |
| C20orf54_wt               | VSMFLPNRSLFLGLVSLVLTGTCFGGYNMAMAVMSPCPLLQGHWGGEVLIV | 400 |
| C20orf54_c.1325_1326delTC | VSMFLPNRSLFLGLVSLVLTGTCFGGYNMAMAVMSPCPLLQGHWGGEVLIV | 400 |
| C20orf54_wt               | ASWVLFSGCLSYVKVMLGVVLRDLRSRALLWCGAAVQLGSLGALLMFPL   | 450 |
| C20orf54_c.1325_1326delTC | ASWVLFSGCLSYVKVMLGVVLRDLRSRALLWCGAAVQLGSLRSAHVPSG   | 450 |
| C20orf54_wt               | VNVLRFSSADFCNLHCPA-----                             | 469 |
| C20orf54_c.1325_1326delTC | QRAAALLVRGLLQSALSSLGRPPPTPPPSLTDGTGVQRGQVTEQGAGTERQ | 500 |
| C20orf54_wt               | ----                                                |     |
| C20orf54_c.1325_1326delTC | SLSN                                                | 504 |

**Figure S1. Wild Type *C20orf54* Protein and *C20orf54* Frameshift Mutant Protein**

Protein sequences of wild type *C20orf54* and the c.1325\_1326delTC (cases 1 & 2) frameshift mutant *C20orf54* are shown. The mutant is predicted to be 35 residues longer than the wild type and is mutated from residue L441. The Genbank accession number for wild type *C20orf54* protein sequence is NP\_21234. The mutant protein sequence was predicted using the Translate tool from the ExpASy website.

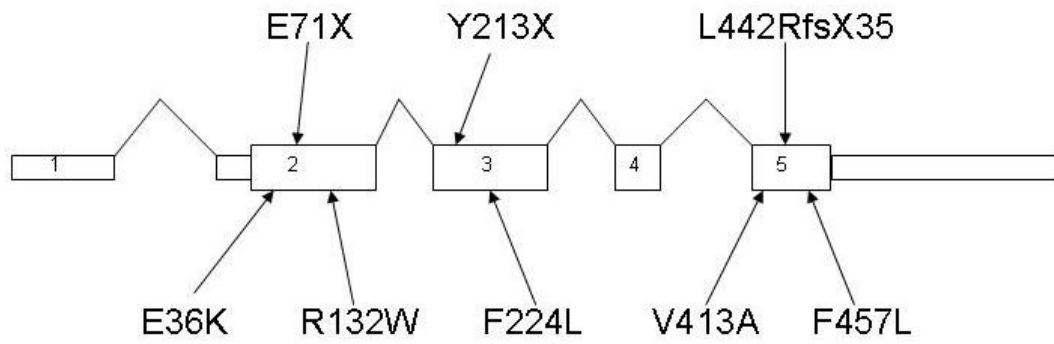

**Figure S2. BVVLS Mutations in *C20orf54***

The 5 exons of *C20orf54* are depicted. Smaller rectangles represent the 5' and 3' untranslated regions. The positions of the mutations described within the text are arrowed

**Table S1. Genotypes of Polymorphisms in Exons of *C20orf54* for Each Mutation**

| Case | dbSNP Reference and Genotype |            |           |                 |            |            |           |           |           |            |           |           |           |           |           |           |           |            |          |
|------|------------------------------|------------|-----------|-----------------|------------|------------|-----------|-----------|-----------|------------|-----------|-----------|-----------|-----------|-----------|-----------|-----------|------------|----------|
|      | Exon 1                       |            | Exon 2    |                 |            |            |           |           |           | Exon 3     |           |           |           |           |           |           | Exon 5    |            |          |
|      | rs1884637                    | rs57012410 | rs6117517 | rs11467076      | rs35655964 | rs34376836 | rs3746808 | rs3746807 | rs6054614 | rs16992990 | rs6054605 | rs3746806 | rs3746805 | rs3746804 | rs3746803 | rs3746802 | rs6054602 | rs62641669 | rs910857 |
| 1,2  | G                            | C          | G         | GGGCAGATA       | C          | C          | T         | C         | A         | C          | C         | C         | T         | C         | C         | A         | G         | G          | T        |
| 3    | G                            | C          | G         | GGGCAGATA       | C          | C          | T         | C         | A         | C          | C         | C         | T         | C         | C         | A         | G         | G          | C        |
| 4    | A/G                          | C          | G         | GGGCAGATA       | C          | C          | C         | C         | A         | C          | C         | C         | C/T       | C         | C         | A         | G         | G          | C        |
| 5,6  | G                            | C          | G         | GGGCAGATA       | C          | C          | T         | C         | A         | C          | C         | C         | T         | C         | C         | A         | G         | G          | C        |
| 7    | A                            | C          | G         | -               | G          | C          | C         | T         | A         | C          | C         | C         | C         | T         | C         | A         | G         | G          | C        |
| 8    | G                            | C          | ND        | -/<br>GGGCAGATA | G/C        | C          | C/T       | C/T       | A         | C          | C         | C         | C         | T         | C/T       | A/G       | G         | G          | C        |
| 9    | A                            | C          | G         | -               | G/C        | C          | C         | C/T       | A         | C          | C         | C         | C         | C/T       | C         | A         | G         | G          | C/T      |

SNPs identified during sequencing of the exons are shown for each BVVLS case described in the manuscript. One base shown indicates homozygous; rs11467076 is an indel of 9bp which are shown as homozygous for the insertion while the deletion is represented by - ;ND = Undetermined
